# Supplementary material
Source: Springer Nature journal article supplement (https://www.springermedizin.de/resource/supplementary/12993_2012_438_MOESM1_ESM.pdf/9617872)

**A**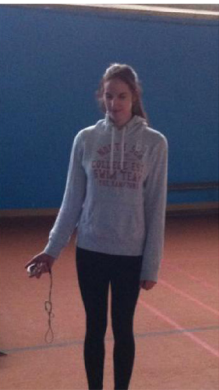**B**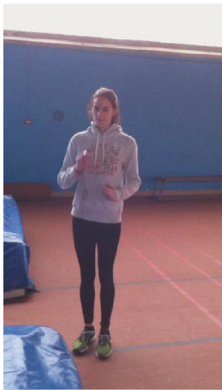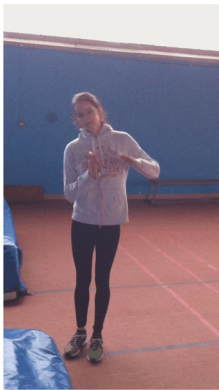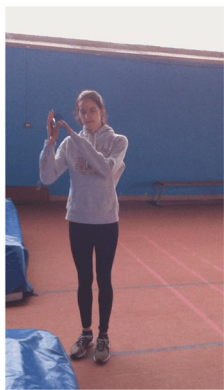

Supplement: MOESM1 [file 9617872]
